# Supplementary material
Source: PubMed Central journal article supplement (PMC6054602)
Supplement: 41366_2018_32_MOESM6_ESM.pdf [file 41366_2018_32_MOESM6_ESM.pdf]

Secondary analysis: Mean difference in neonatal abdominal adiposity according to maternal plasma 25 (OH)D status (i.e. sufficiency vs. inadequacy) in GUSTO Study

|                                          | Model A                    |                            |                             | Model B                    |                           |                             |
|------------------------------------------|----------------------------|----------------------------|-----------------------------|----------------------------|---------------------------|-----------------------------|
|                                          | sSAT (ml)                  | dSAT (ml)                  | IAT (ml)                    | sSAT (ml)                  | dSAT (ml)                 | IAT (ml)                    |
| <b>Whole MRI cohort (N=292)</b>          |                            |                            |                             |                            |                           |                             |
| 25(OH)D sufficiency (>75.0 nmol/L)       | Reference                  | Reference                  | Reference                   | Reference                  | Reference                 | Reference                   |
| 25(OH)D inadequacy ( $\leq$ 75.0 nmol/L) | 5.9 (1.0, 10.8)<br>P=0.018 | 1.7(0.4, 3.0)<br>P=0.011   | 0.6 (-1.2, 2.4)<br>P =0.525 | 8.3 (3.0, 13.5)<br>P=0.002 | 2.3 (0.9, 3.7)<br>P=0.001 | 1.3 (-0.6, 3.2)<br>P =0.180 |
| <b>Non-GDM cohort (N=237)</b>            |                            |                            |                             |                            |                           |                             |
| 25(OH)D sufficiency (>75.0 nmol/L)       | Reference                  | Reference                  | Reference                   | Reference                  | Reference                 | Reference                   |
| 25(OH)D inadequacy ( $\leq$ 75.0 nmol/L) | 4.2 (-0.8, 9.2)<br>P=0.102 | 1.6 (0.2, 2.9)<br>P= 0.026 | 0.4 (-1.4, 2.2)<br>P=0.663  | 5.4 (0.6, 10.6)<br>P=0.047 | 1.8 (0.4, 3.2)<br>P=0.011 | 0.7 (-1.2, 2.6)<br>P=0.470  |

Associations shown are differences in mean (95% CI) of 25(OH)D inadequacy group vs the reference 25(OH)D sufficient group.

Total sample size (N) is not always 292 or 237 due to the missing values. P values were determined with the use of a multivariable regression models.

**Model A** controlled for ethnicity, sex, age on MRI day, gestational week, maternal age, maternal education, maternal pre-pregnancy BMI, parity and *maternal fasting glucose levels at mid-gestation* .

**Model B** controlled for ethnicity, sex, age on MRI day, gestational week, maternal age, maternal education, maternal pre-pregnancy BMI, parity and *maternal 2 hour OGTT glucose levels at mid-gestation* .

Abbreviations:

sSAT: abdominal superficial subcutaneous adipose tissue, dSAT: abdominal deep subcutaneous adipose tissue, IAT: abdominal internal adipose tissue
